# Supplementary material for: Copper nanoparticles generated from aggregates of a hexarylbenzene derivative: a reusable catalytic system for ‘click’ reactions
Source: Royal Society of Chemistry journal article supplement (doi:10.1039/c4cc08589b), 2014-11-10
Supplement: c4cc08589b1.pdf [file c4cc08589b1.pdf]

Electronic Supplementary Information

**Copper Nanoparticles Generated by Aggregates of Hexarylbenzene derivative: A Reusable Catalyst for 'Click' Reaction**

**Sharanjeet Kaur, Vandana Bhalla,\* and Manoj Kumar\***

*Department of chemistry, UGC Center for Advanced Studies Guru Nanak Dev University,  
Amritsar, INDIA-143005*

[vanmanan@yahoo.co.in](mailto:vanmanan@yahoo.co.in), [mksharmaa@yahoo.co.in](mailto:mksharmaa@yahoo.co.in)

**Page No. Contents**

**S3-S4** General experimental method and synthetic route to derivative **3**.

**S5-S7**  $^1\text{H}$  NMR,  $^{13}\text{C}$  NMR and Mass spectra of derivative **3**.

**S8** Absorption spectrum of derivative **3** at various fraction of  $\text{H}_2\text{O}$  in  $\text{CH}_3\text{CN}$  and Scanning electron microscopy (SEM) images of derivative **3** in  $\text{H}_2\text{O}/\text{CH}_3\text{CN}$  (5/5) mixture

**S9** Dynamic light scattering studies of derivative **3** in  $\text{H}_2\text{O}/\text{CH}_3\text{CN}$  (5/5) mixture and fluorescence emission spectra of derivative **3** in  $\text{H}_2\text{O}/\text{CH}_3\text{CN}$  (5/5) mixture.

**S10** Fluorescence spectra of derivative **3** in different  $\text{H}_2\text{O}/\text{glycerol}$  mixture and concentration dependent fluorescence spectra of derivative **3**.

**S11** Fluorescence life time decay profile of derivative **3** in  $\text{CH}_3\text{CN}$  and  $\text{H}_2\text{O}/\text{CH}_3\text{CN}$  (5/5) mixture and Stern-Volmer plot of derivative **3** in presence of copper ions in  $\text{H}_2\text{O}/\text{CH}_3\text{CN}$  (5/5).

**S12** Detection limit plot of derivative **3** for  $\text{Cu}^{2+}$  ions in pure in  $\text{H}_2\text{O}/\text{CH}_3\text{CN}$  (5/5).

**S13** Fluorescence emission spectra of derivative **3** in presence of various metal chloride/perchlorate and overlay  $^1\text{H}$  NMR spectra of derivative **3** and copper nanoparticles.

**S14** SEM-EDX spectrum of aggregates of **3** in presence of copper chloride show the presence of copper nanoparticles. and DLS studies of copper nanoparticles.

**S15-S16** Procedure for preparation of CuNPs, procedure for catalytic reaction in presence of CuNPs, procedure for reusability and procedure for synthesis of derivative **7**.

**S17-S23**  $^1\text{H}$  NMR spectra of catalytic reactions.

**S24** Comparison of present method over other reported procedure in literature for the preparation of copper nanoparticles.

**S25** Comparison of catalytic efficiency of generated CuNPs in present manuscript with literature Reports.

## General experimental methods

All the fluorescence spectra were recorded on SHIMADZU 5301 PC spectrofluorometer. UV spectra were recorded on Shimadzu UV-2450 PC spectrophotometer with a quartz cuvette (path length: 1 cm). The cell holder was thermostated at 25°C. Elemental analysis was done using a Flash EA 1112 CHNS/O analyzer of Thermo Electron Corporation. The dynamic light scattering (DLS) data were recorded with a Malvern Instruments Nano-ZS. The time-resolved fluorescence spectra were recorded with a HORIBA time-resolved fluorescence spectrometer. <sup>1</sup>H and <sup>13</sup>C NMR spectra were recorded on a JEOL-FT NMR-AL 300 MHz spectrophotometer, Bruker (Avance II) FT-NMR-AL 400 and 500 MHz spectrophotometer using CDCl<sub>3</sub> as solvent and tetramethylsilane (Si(CH<sub>3</sub>)<sub>4</sub>) for internal standards. Data are reported as follows: chemical shifts in parts per million (d), multiplicity (s = singlet, br = broad signal, d = doublet, m = multiplet), coupling constants (Hz), integration, and interpretation. All spectrophotometric titration curves were fitted with SPECFIT 32 software. All spectral characterizations were carried out in HPLC-grade solvents at 20°C within a 10 mm quartz cell.

**Fluorescence quantum yield:** 9,10-Diphenylanthracene ( $\Phi_f = 0.90$ ) in cyclohexane has been used as standard in the measurement of fluorescence quantum yield by using eqn (1), in which  $\Phi_s$  is the radiative quantum yield of the sample;  $\Phi_{fr}$  is the radiative quantum yield of the reference;  $A_s$  and  $A_r$  are the absorbance of the sample and the reference, respectively;  $D_s$  and  $D_r$  are the areas of emission for the sample and reference;  $L_s$  and  $L_r$  are the lengths of the absorption cells; and  $N_s$  and  $N_r$  are the refractive indices of the sample and reference solutions (pure solvents were assumed).

$$\Phi_{Fs} = \Phi_{Fr} \times \frac{1-10^{-A_r L_r}}{1-10^{-A_s L_s}} \times \frac{N_s^2}{N_r^2} \times \frac{D_s}{D_r}$$

Equation 1

**Procedure for analytes sensing:** UV-vis and fluorescence titrations were performed on 1  $\mu$ M solutions of ligand (3  $\mu$ l of CH<sub>3</sub>CN are used to dissolve) in H<sub>2</sub>O/ CH<sub>3</sub>CN (5:5, v/v) with different metal ions such as Cu<sup>2+</sup>, Fe<sup>2+</sup>, Fe<sup>3+</sup>, Hg<sup>2+</sup>, Co<sup>2+</sup>, Pb<sup>2+</sup>, Zn<sup>2+</sup>, Ni<sup>2+</sup>, Cd<sup>2+</sup>, Ag<sup>+</sup>, Ba<sup>2+</sup>, Mg<sup>2+</sup>, K<sup>+</sup>, Na<sup>+</sup>, and Li<sup>+</sup> as their chloride/perchlorate salts. In titration experiments, each time a 3 ml solution of **3** was filled in a quartz cuvette (path length, 1 cm) and spectra were recorded.

**Fluorescence Lifetime ( $\tau_f$ ) Measurement.** The time-resolved fluorescence spectra were recorded with a HORIBA time-resolved fluorescence spectrometer. Decays were monitored at the corresponding emission maximum of the compounds. In-built software allowed the fitting of the decay spectra ( $\chi^2 = 1-1.5$ ) and yielded the fluorescence lifetimes. Decay curves were fitted either as a single exponential or multiexponential functions as:

$$F(t) = \sum F_i(0) \exp(-t/\tau_i)$$

where  $\tau_i$  is the emission lifetime and  $F_i(0)$  is the pre-exponential factor of the  $i^{\text{th}}$  component of the sample.

## Experimental details

**Synthesis of Compound (3).** A solution of 3,7-bis(phenylethynyl)dibenzo[b,d]thiophene 5,5-dioxide **1**<sup>1</sup> (0.35 g, 1.0 mmol) and 2,5-diphenyl-3,4-di(pyridin-2-yl)cyclopenta-2,4-dienone **2**<sup>2</sup> (0.34 g, 1.05 mmol) in 2 mL of diphenylether was refluxed for 24 h under an inert atmosphere. Cold methanol (10 mL) was added to the reaction mixture. The methanol layer was decanted off, and the insoluble dark oil was subjected to column chromatography using 7:3 CHCl<sub>3</sub>/hexane as the eluent. The compound was recrystallized from methanol to give **3** as a beige solid Yield 74%. <sup>1</sup>H NMR (400 MHz, CDCl<sub>3</sub>):  $\delta$  8.14 (d, 4H, J = 4 Hz, ArH), 7.17-7.21 (m, 4H, ArH), 7.11 (s, 2H, ArH), 7.05 (d, 2H, J = 4 Hz, ArH), 6.94-6.96 (m, 10H, ArH), 6.83-6.92 (m, 25H, ArH), 6.73-6.76 (m, 6H, ArH), <sup>13</sup>C NMR (125 MHz, CDCl<sub>3</sub>): 115.01 (ArH), 115.74 (ArH), 119.13 (ArH), 120.94 (ArH), 121.27 (ArH), 121.36 (ArH), 121.88 (ArH), 121.96 (ArH), 122.13 (ArH), 122.26 (ArH), 122.81 (ArH), 123.65 (ArH), 126.17 (ArH), 126.27 (ArH), 126.54 (ArH), 126.69 (ArH), 129.84 (ArH), 131.60 (ArH), 132.14 (ArH), 134.07 (ArH), 134.66 (ArH), 135.15 (ArH), 134.59 (ArH), 135.94 (ArH), 136.53 (ArH), 137.90 (ArH), 143.01 (ArH), 153.90 (ArH), MS m/z 1133.35: [M + 1]<sup>+</sup> calcd for C<sub>80</sub>H<sub>52</sub>N<sub>4</sub>O<sub>2</sub>S; C, 84.78%; H, 4.62%; N, 4.94%; S, 2.83%; found: C, 84.61%; H, 4.43%; N, 4.83%; S, 2.801.

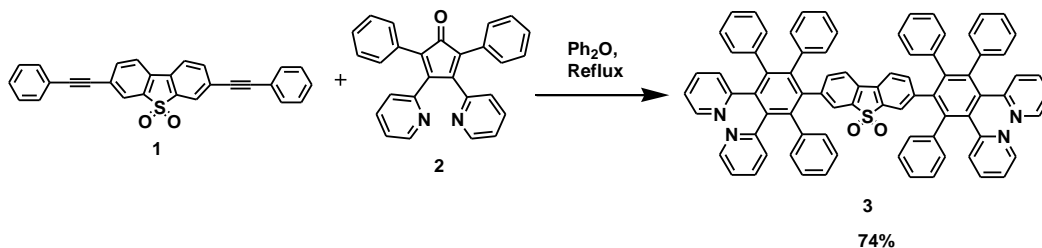

**Scheme S1.** Synthesis of derivative **3**.

<sup>1</sup> Wang, C.; Dong, H.; Li, H.; Zhao, H.; Meng, Q.; Hu, W. *Crystal Growth & Design* **2010**, *9*, 10.

<sup>2</sup> Li, Z.; Zhang, L.; Wang, L.; Guo, Y.; Cai, L.; Yu, M.; Wei, L. *Chem. Commun.* **2011**, *47*, 5798.

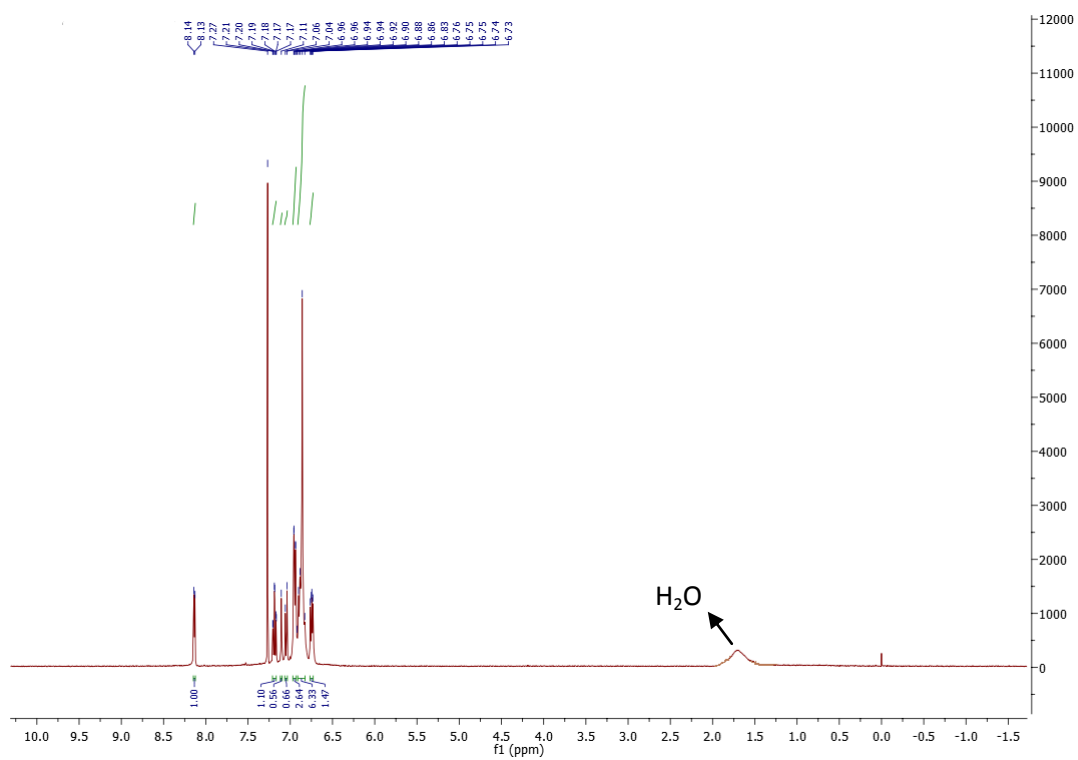

**Fig. S1**  $^1\text{H}$  NMR Spectra ( $\text{CDCl}_3$ , 400 MHz, ppm) of compound 3.

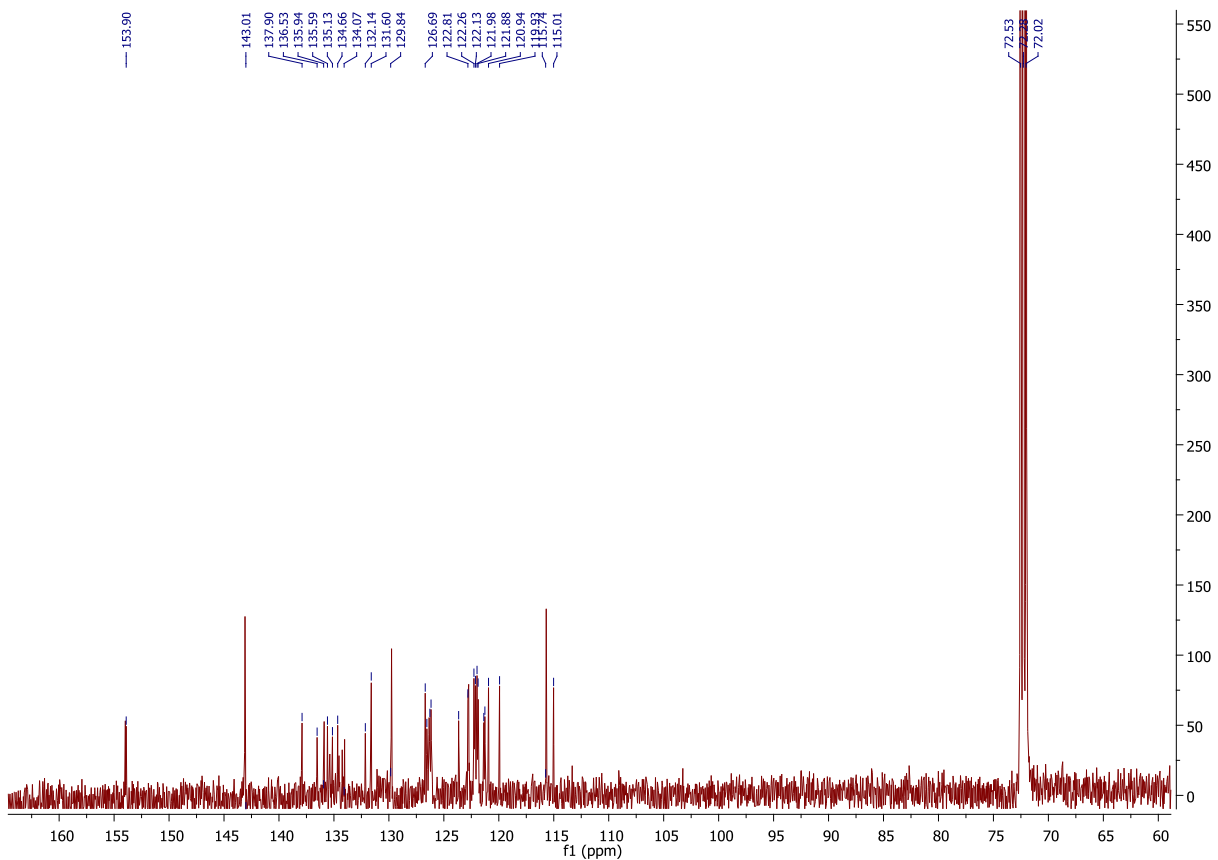

**Fig. S2**  $^{13}\text{C}$  NMR Spectra ( $\text{CDCl}_3$ , 125 MHz, ppm) of compound 3:

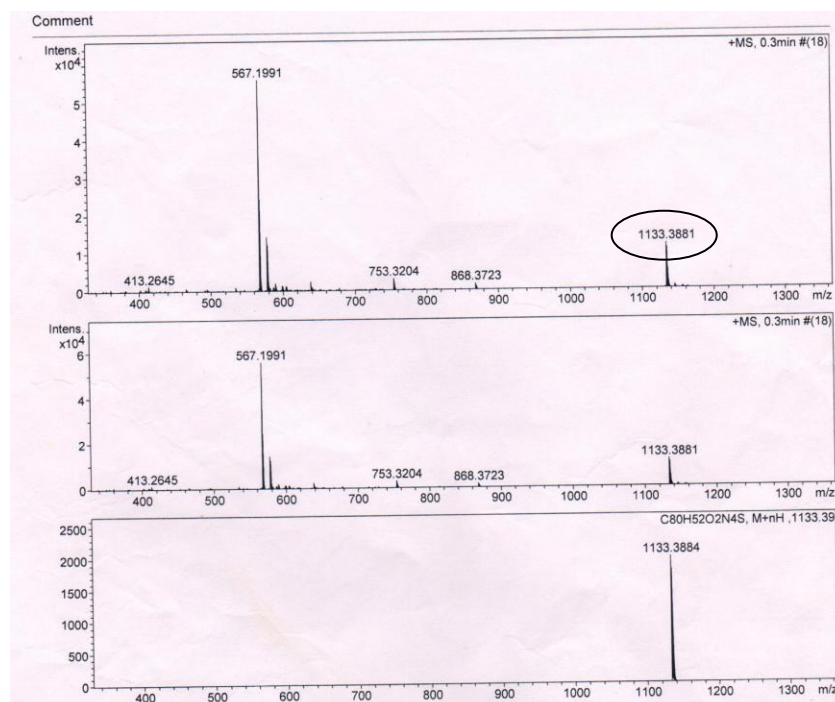

**Fig. S3** Mass Spectrum (ESI-MS) of compound 3.

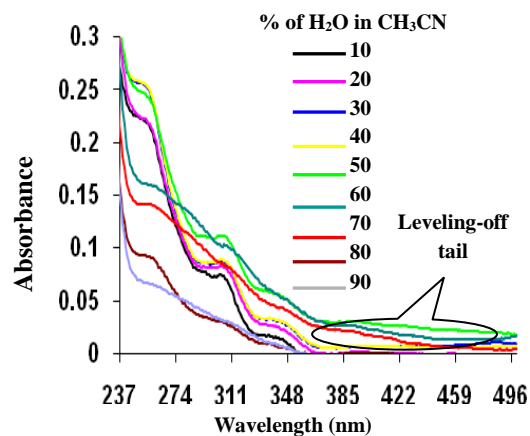

**Fig. S4** UV-vis spectra of derivative **3** (1  $\mu\text{M}$ ) showing the variation of absorbance in  $\text{H}_2\text{O}/\text{CH}_3\text{CN}$  mixture (0–90% volume fraction of water in  $\text{CH}_3\text{CN}$ ).

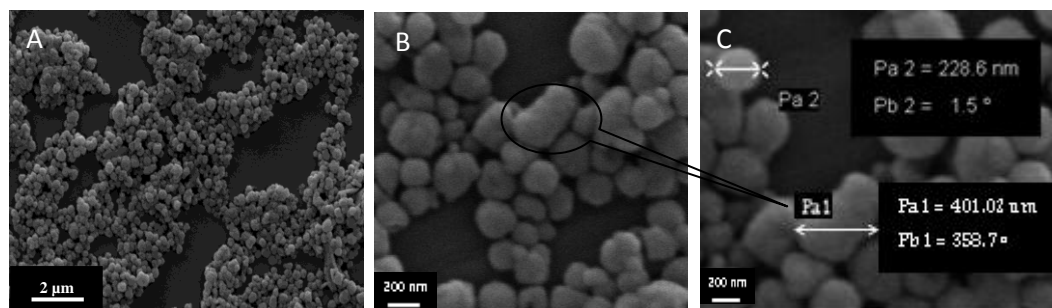

**Fig. S5** Scanning electronic microscopy (SEM) images of derivative **3** in  $\text{H}_2\text{O}/\text{CH}_3\text{CN}$  (5/5) mixture.



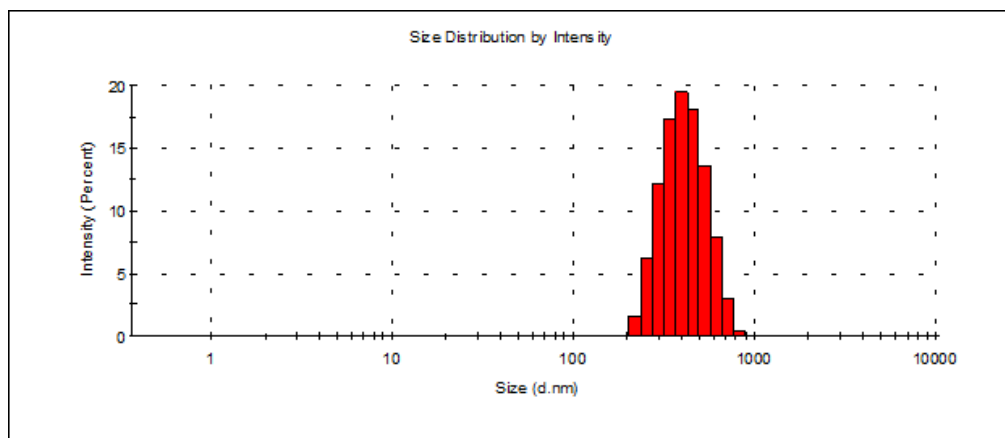

**Fig. S6** The dynamic light scattering (DLS) studies derivative **3** showing the average diameter of aggregates is in the range of 400 nm in H<sub>2</sub>O/CH<sub>3</sub>CN (5/5).

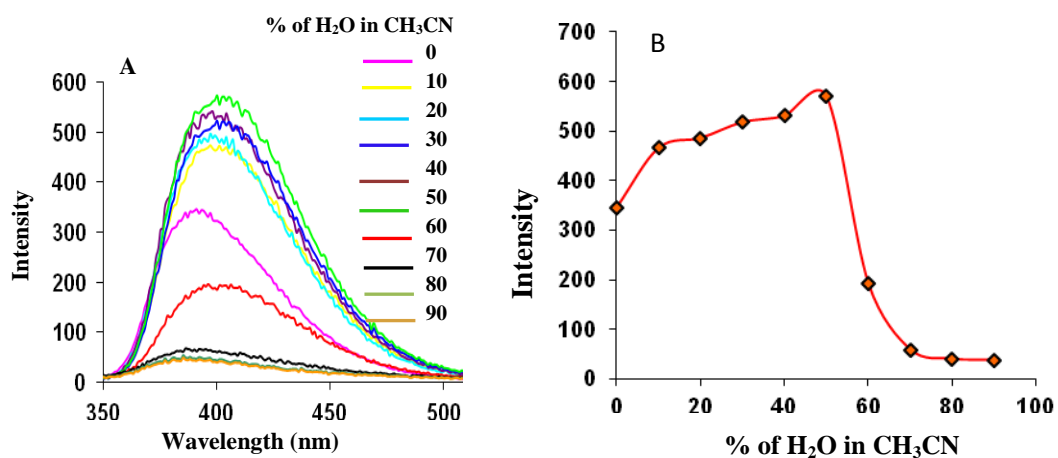

**Fig. S7** (A) Fluorescence emission spectra of derivatives **3** (1 μM) in different ratios of H<sub>2</sub>O/CH<sub>3</sub>CN at  $\lambda_{ex}$  = 300 nm. (B) Change in fluorescence intensity with change in volume fraction of water in CH<sub>3</sub>CN.

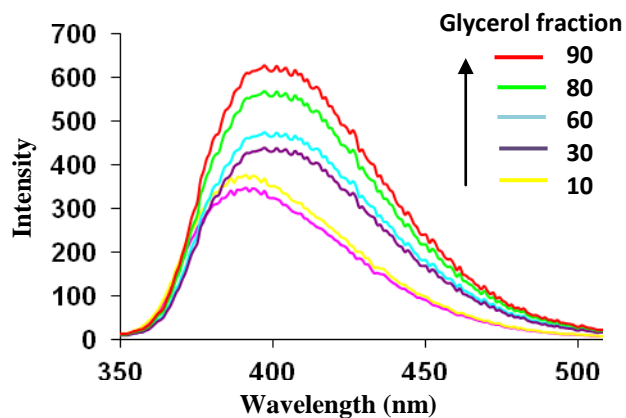

**Fig. S8** Fluorescence spectra of derivative **3** (1 μM) showing the variation of fluorescence intensity in CH<sub>3</sub>CN/glycerol mixtures with different glycerol fractions

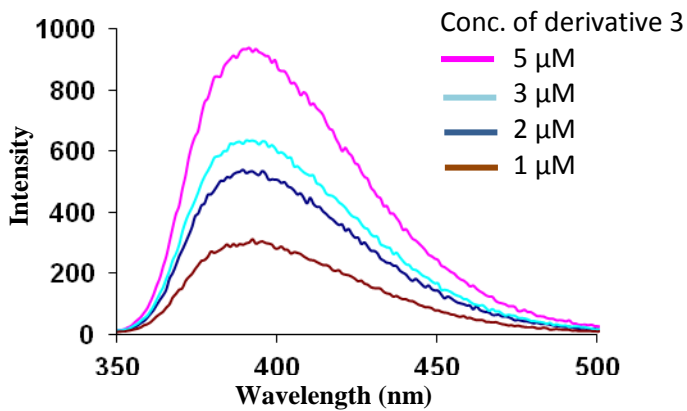

**Fig. S9** The change in fluorescence spectra of derivative **3** in CH<sub>3</sub>CN with increase in concentration.

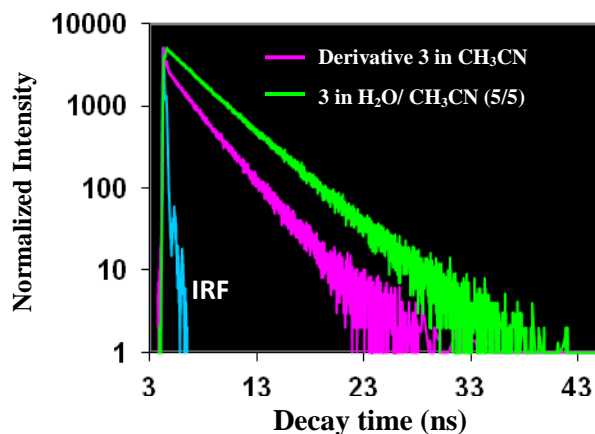

**Fig. S10** Fluorescence lifetime decay profile of derivative **3** in pure CH<sub>3</sub>CN (pink) and H<sub>2</sub>O:CH<sub>3</sub>CN (5/5) (green).

| S. No                                                     | $\lambda_{\text{max}}^{\text{a}}$ | Quantum yield ( $\Phi_{\text{F}}^{\text{b}}$ ) | $A_1/A_2^{\text{c}}$ | $\tau_{\text{F1}}^{\text{d}}$ (ns) | $\tau_{\text{F2}}^{\text{d}}$ (ns) | $\tau_{\text{av}}^{\text{e}}$ (ns) | $k_{\text{f}}^{\text{f}}$ ( $10^9 \text{ S}^{-1}$ ) | $k_{\text{nr}}^{\text{g}}$ ( $10^9 \text{ S}^{-1}$ ) |
|-----------------------------------------------------------|-----------------------------------|------------------------------------------------|----------------------|------------------------------------|------------------------------------|------------------------------------|-----------------------------------------------------|------------------------------------------------------|
| Derivative 3 in pure CH <sub>3</sub> CN                   | 390 nm                            | 0.11                                           | 89.91/10.09          | 0.32                               | 2.7                                | 0.56                               | 0.19                                                | 1.58                                                 |
| Derivative 3 in H <sub>2</sub> O/CH <sub>3</sub> CN (5/5) | 405 nm                            | 0.47                                           | 27.45/72.55          | 0.62                               | 3.01                               | 2.35                               | 0.20                                                | 0.22                                                 |

**Table S1** Comparative photophysical properties of derivative **3** in CH<sub>3</sub>CN and H<sub>2</sub>O/CH<sub>3</sub>CN (5/5): <sup>a</sup> emission maximum (nm). <sup>b</sup> Measured using a Quantaaurus-QY. <sup>c</sup>  $A_1$ ,  $A_2$  : fractional amount of molecules in each environment. <sup>d</sup>  $\tau_{\text{F1}}$  and  $\tau_{\text{F2}}$ : biexponential life time of derivative **3** in CH<sub>3</sub>CN and H<sub>2</sub>O/CH<sub>3</sub>CN (5/5). <sup>e</sup>  $\tau_{\text{av}}$  :average life time decay. <sup>f</sup> radiative rate constant ( $k_{\text{f}} = \Phi_{\text{F}}/\tau_{\text{av}}$ ). <sup>g</sup> nonradiative rate constant ( $k_{\text{nr}} = (1 - \Phi_{\text{F}})/\tau_{\text{av}}$ ).

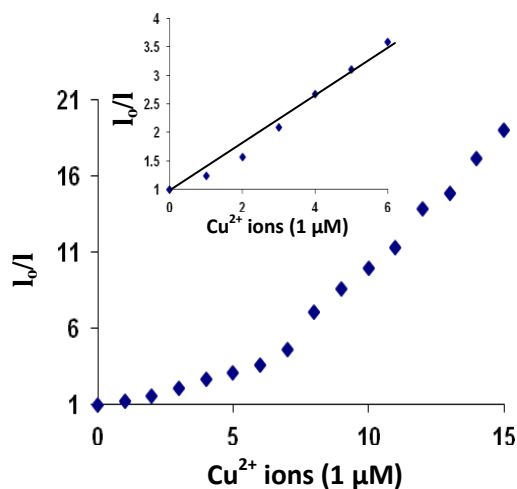

**Fig. S11** Variation of fluorescence of aggregates of derivative **3** (1  $\mu\text{M}$ ) at 405 nm in H<sub>2</sub>O/CH<sub>3</sub>CN (1:1, v/v) buffered with HEPES, pH =7.0,  $\lambda_{\text{ex}}$ =300 nm in the presence of different concentrations of Cu<sup>2+</sup> ions ( $I_0/I$ ;  $I_0$ =initial fluorescence intensity at 405 nm;  $I$ = fluorescence intensity after the addition of Cu<sup>2+</sup> ions at 405 nm).

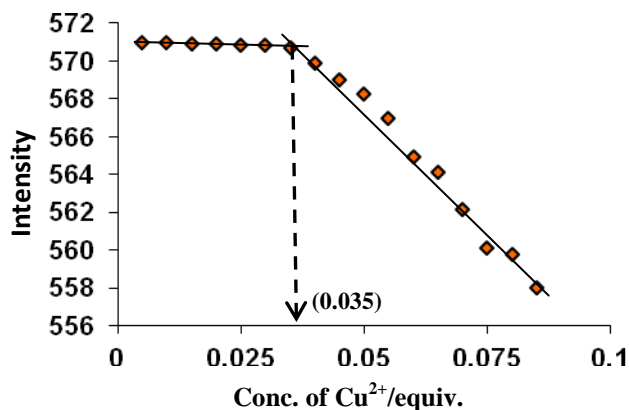

**Fig. S12a:** Showing the fluorescence intensity of derivative **3** at 405 nm as a function of  $\text{Cu}^{2+}$  ions concentration (equiv.) in  $\text{H}_2\text{O}/\text{CH}_3\text{CN}$  (5:5, v/v) buffered with HEPES, pH = 7.05,  $\lambda_{\text{ex}}$  = 300 nm.

To determine the detection limit, fluorescence titration of compound **3** with  $\text{Cu}^{2+}$  ions was carried out by adding aliquots of copper solution (in equiv.) and the fluorescence intensity as a function of  $\text{Cu}^{2+}$  ions added was then plotted. From this graph the concentration at which there was a sharp change in the fluorescence intensity multiplied with the concentration of receptor **3** gave the detection limit.

**Equation used for calculating detection limit (DL):**

$$\text{DL} = \text{CL} \times \text{CT}$$

CL = Conc. of Ligand; CT = Conc. of Titrant at which change observed.

**Detection limit (DL) of  $\text{Cu}^{2+}$  ions with **3**:**

$$\text{Thus; DL} = 0.035 \times 10^{-6} = 35 \times 10^{-9} = 35 \text{ nM.}$$

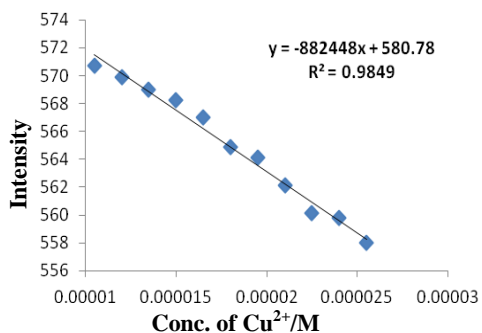

Multiple R = 0.99242

$R^2 = 0.9849$

Standard deviation = 0.009,

Observation = 11,

Intercept = 580.78

Slope = 882448

**Figure S12b:** Calibrated curve showing the fluorescence intensity of compound **3** at 405 nm as a function of  $\text{Cu}^{2+}$  ions concentration (equiv.) in  $\text{H}_2\text{O}/\text{CH}_3\text{CN}$  (5:5, v/v) buffered with HEPES, pH = 7.05,  $\lambda_{\text{ex}}$  = 300.

For comparison we have calculated the detection limit by another method (reference: *Dalton Trans.* **2013**, *42*, 15113–15119)

The detection limit was calculated based on the fluorescence titration. To determine the S/N ratio, the emission intensity of receptor **3** without  $\text{Cu}^{2+}$  was measured by 11 times and the standard deviation of blank measurements was determined. The detection limit is then calculated with the following equation:

$$\text{DL} = 3 \times \text{SD}/\text{S}$$

Where SD is the standard deviation of the blank solution measured by 10 times; S is the slope of the calibration curve.

**From the graph we get slope**

S = 882448, and SD value is 0.009

Thus using the formula we get the Detection Limit

$$(\text{DL}) = 3 \times 0.009/882448 = 30.5 \times 10^{-9} \text{ M} = 30.5 \text{ nM}$$

i.e. probe **3** can detect  $\text{Cu}^{2+}$  ions in this minimum concentration through fluorescence method.

**Reference:** Goswami, S.; Das, S.; Aich, K.; Sarkar, D.; Kumar, T. M.; Quah, C. K.; Fun, H. K. CHEF induced highly selective and sensitive turn-on fluorogenic and colorimetric sensor for  $\text{Fe}^{3+}$ . *Dalton Trans.* **2013**, *42*, 15113–15119.

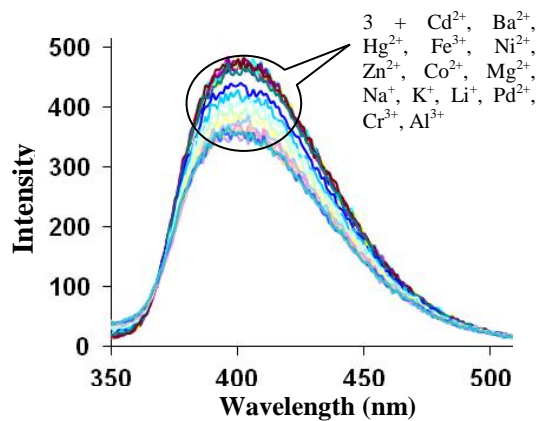

**Fig. S13** Change in the fluorescence spectra of compound **3** (1  $\mu$ M) upon additions of metal perchlorates/chloride (50  $\mu$ M) in CH<sub>3</sub>CN/water (1:1) buffered with HEPES, pH = 7.05.

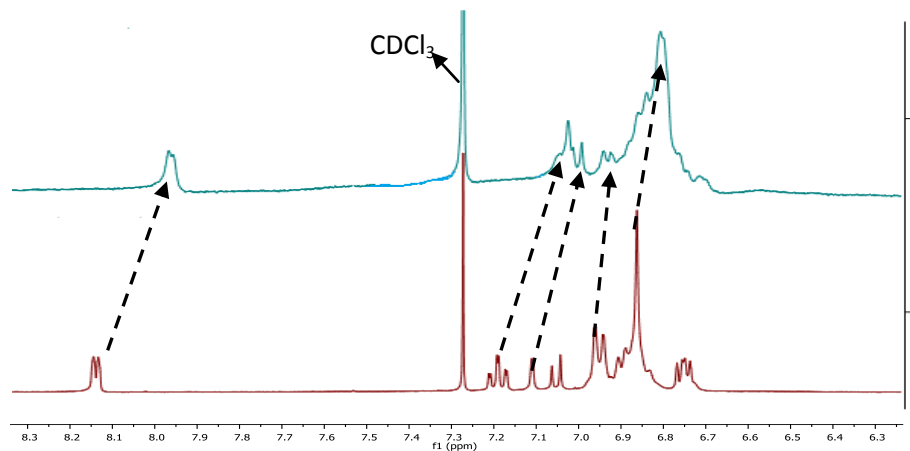

**Fig. S14** Overlay <sup>1</sup>H NMR spectra of derivative **3** (red) and copper nanoparticle (blue) respectively, after filtration with THF and CHCl<sub>3</sub>.

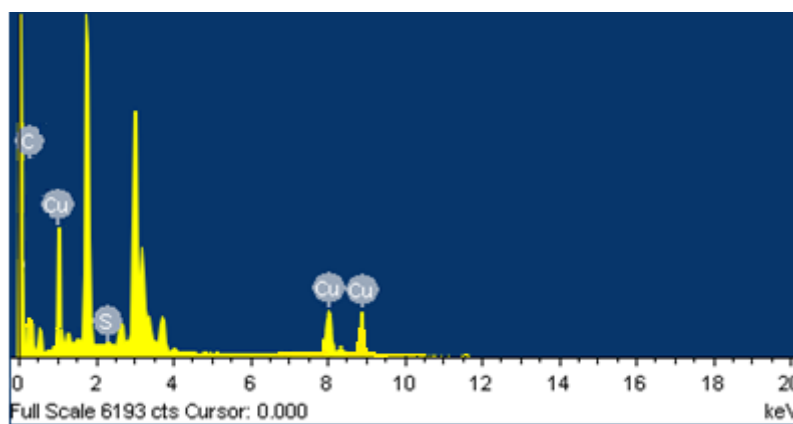

**Fig. S15** The SEM-EDX spectrum of aggregates of **3** in presence of copper chloride show the presence of copper nanoparticles.

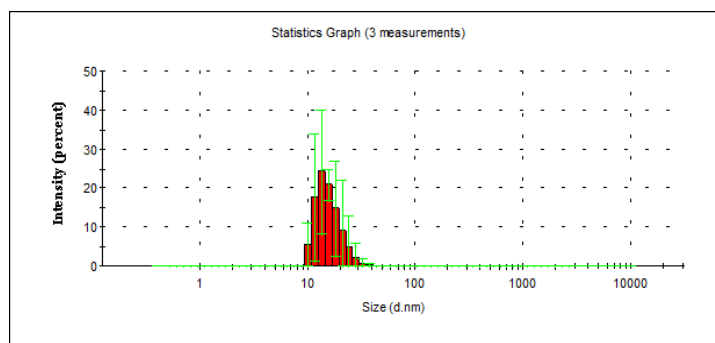

**Fig. S16** The dynamic light scattering (DLS) studies of derivative **3** in presence of 20 equiv. of  $\text{CuCl}_2$  ions, showing the average diameter of copper nanoaggregates is 13.54 nm.

## CuAAC (procedure and $^1\text{H}$ NMR of final products):

**Synthesis of copper Nanoparticles.** To a 3 ml solution of derivative **3** (0.1 mM) was added 60  $\mu\text{l}$  of  $10^{-1}$  M solution of  $\text{CuCl}_2$  (20 equiv.) in  $\text{CH}_3\text{CN}/\text{H}_2\text{O}$  (1:1, v/v). The reaction was stirred at room temperature for 10 min and formation of nanoparticles take place. These nanoparticles solution was used as such in the catalytic experiment.

**General procedure for the CuNPs catalyzed azide-alkyne 'click' reaction:** A 25 ml round bottom flask is charged with solution with 1.05 mmol of alkyne and 1 mmol of organic azide and 0.1% mol of nano catalyst (CuNPs). The reaction mixture is stirred during 25 to 30 min at room temperature under  $\text{N}_2$ . The final product is extracted from water with  $\text{CH}_2\text{Cl}_2$  (3 x 5 mL). The organic layer is dried with  $\text{Na}_2\text{SO}_4$  and the solvent is removed *in vacuo* to give the corresponding 1,2,3-triazole. The product is then purified by silica chromatography.

**A typical procedure for the catalyst-reusing sequence in the CuNPs-catalyzed 'Click' reaction:** After the reaction was performed under the conditions of Table 1, 1.05 mmol of alkyne and 1 mmol of organic azide were added to the reaction mixture. It was used next catalytic sequence under the same reaction conditions as first cycle. In each cycle the reactants are fully consumed within 25 to 35 min. It was observed that after five recycles, the isolated yield of corresponding product was still up to 90%, which indicates that nano catalyst CuNPs have high catalytic activity and stability in our experimental conditions (Table 1). Thus, the CuNPs can be recycled and at least five times without significant loss of their catalytic activity.

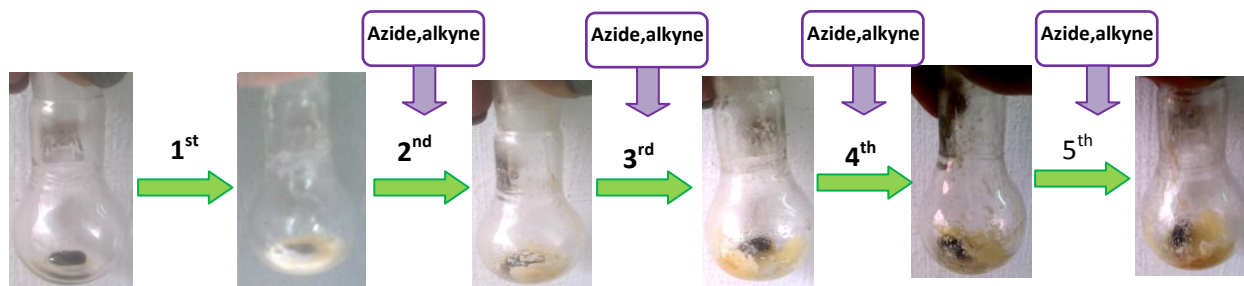

**Figure S17.** Depiction of the catalyst-reusing for entry 4 in Table 1.

**CuNPs catalyzed cycladdition reaction between hexyl Azide and Phenyl Acetylene Using Various Amounts of CuNPs:** A 25 ml round bottom flask is charged with solution with 1.05 mmol of phenyl acetylene and 1 mmol of hexyl azide and (1-0.0005 mol %) of nano catalyst (CuNPs). The reaction mixture is stirred during 25 min to 15 h at room temperature under N<sub>2</sub>. The final product is extracted from water with CH<sub>2</sub>Cl<sub>2</sub> (3 x 5 mL). The organic layer is dried with Na<sub>2</sub>SO<sub>4</sub> and the solvent is removed *in vacuo* to give the corresponding 1,2,3-triazole. The product is then purified by silica chromatography.

**Synthesis of Compound (7).** A 25 ml round bottom flask is charged with solution with 1.05 mmol of 2,3,6,7,10,11-hexakis(prop-2-ynoxy)triphenylene **5** and 1 mmol of hexyl azide **6** and 0.1% mol of nano catalyst (CuNPs) in 2 ml of CH<sub>3</sub>CN. The reaction mixture is stirred during 15 h at 50°C. The final product is extracted from water with CH<sub>2</sub>Cl<sub>2</sub> (3 x 5 mL). The organic layer is dried with Na<sub>2</sub>SO<sub>4</sub> and the solvent is removed *in vacuo* to give the corresponding 1,2,3-triazole. The product is then purified by silica chromatography.

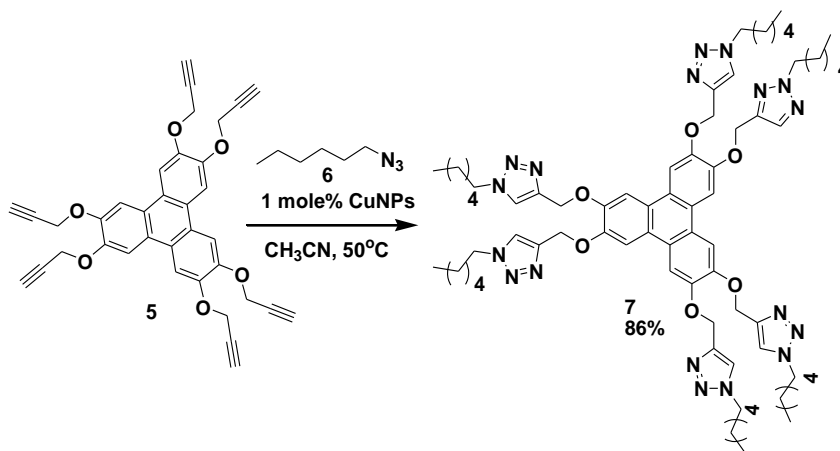

**Scheme S2.** Synthesis of Triphenylene-based discotic liquid crystal **7** bearing 1,2,3-triazole groups using “click” chemistry in presence of 1 mole% CuNPs



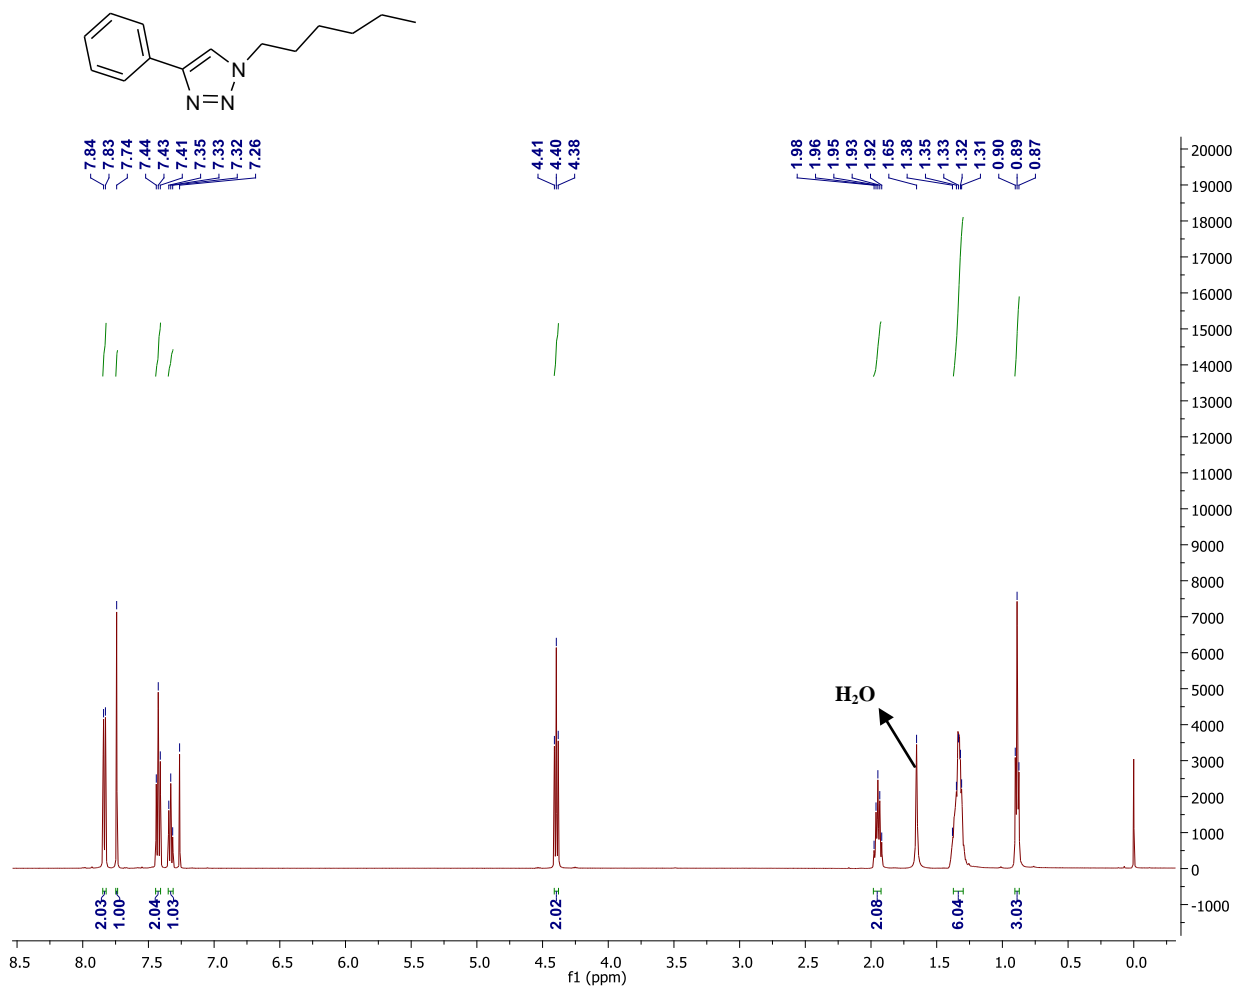

**Fig. S18**  $^1\text{H}$  NMR spectrum of **1-hexyl-4-phenyl-1H-1,2,3-triazole** ( $\text{CDCl}_3$ , 500 MHz, ppm)

$^1\text{H}$  NMR (500 MHz,  $\text{CDCl}_3$ )  $\delta$  ppm: 7.84 (d, 2H), 7.74 (s, 1H), 7.41-7.44 (m, 2H), 7.32-7.35 (m, 1H), 4.39 (t, 2H), 1.92-1.98 (m, 2H), 1.31-1.38 (m, 6H), 0.89 (t, 3H).

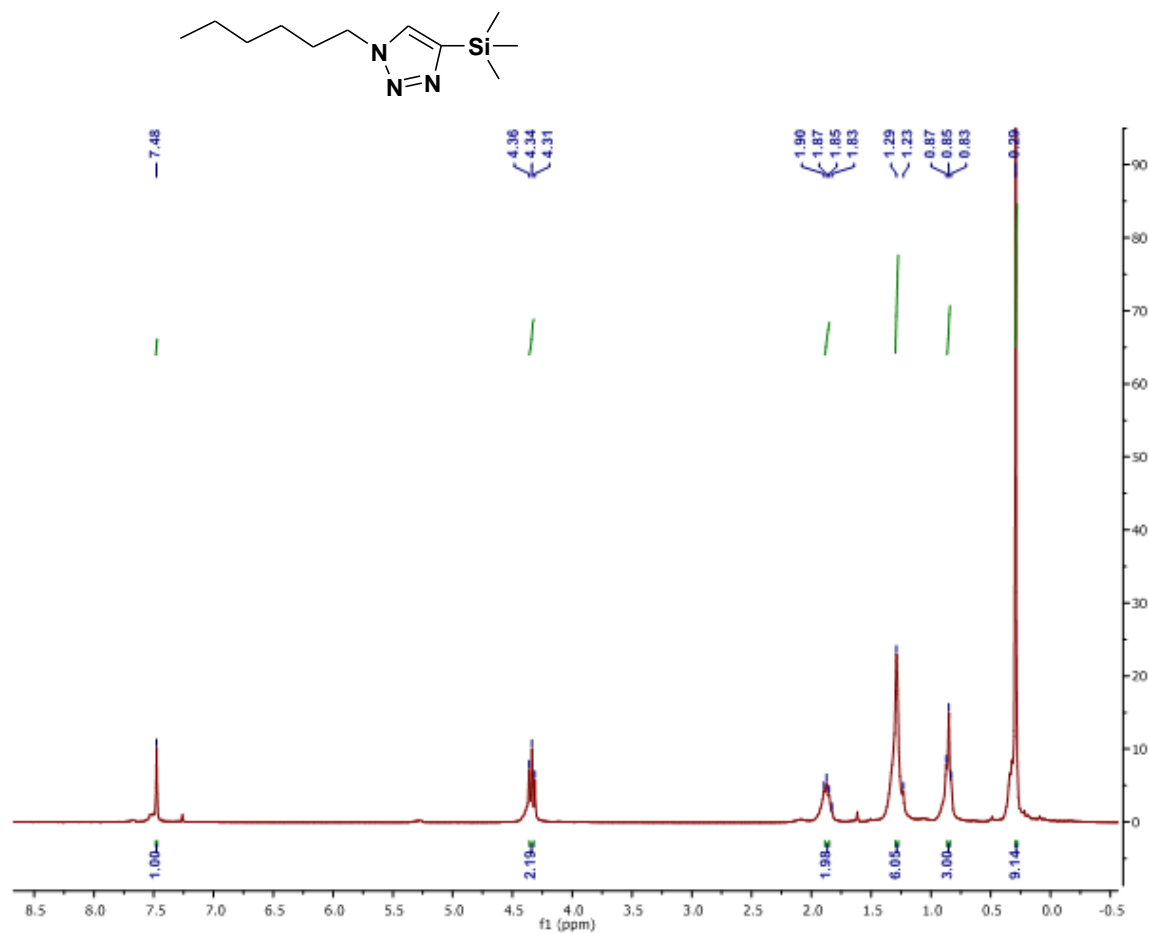

**Fig. S19** <sup>1</sup>H NMR spectrum of **1-hexyl-4-(trimethylsilyl)-1H-1,2,3-triazole** (CDCl<sub>3</sub>, 300 MHz, ppm)

<sup>1</sup>H NMR (500 MHz, CDCl<sub>3</sub>) δ ppm: 7.48 (s, 1H), 4.33 (t, 2H), 1.83-1.90 (m, 2H), 1.23-1.29 (m, 6H), 0.85 (t, 3H), 0.29 (s, 9H)

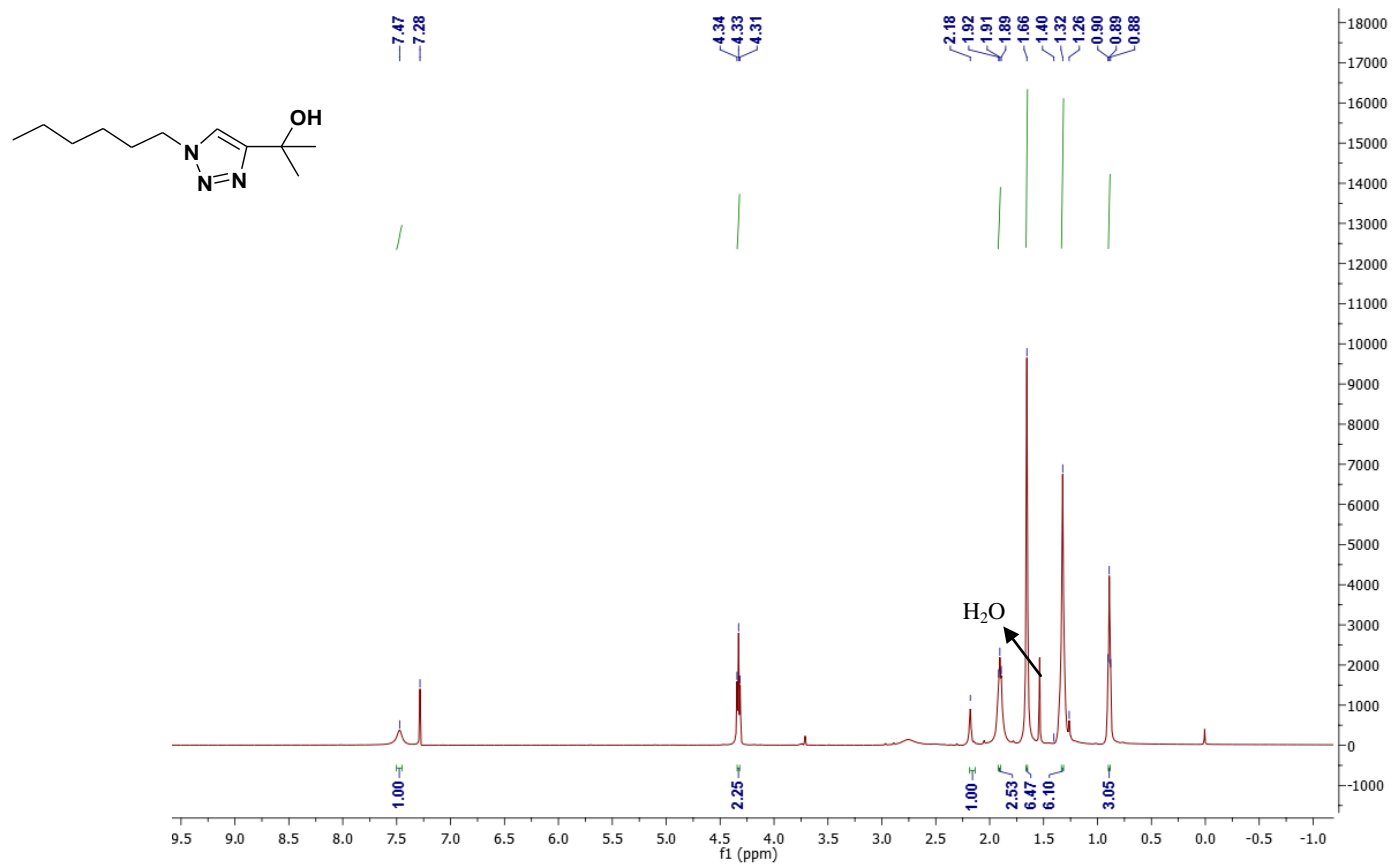

**Fig. S20**  $^1\text{H}$  NMR spectrum of **2-(1-benzyl-1H-1,2,3-triazol-4-yl)propan-2-ol** ( $\text{CDCl}_3$ , 500 MHz, ppm)

$^1\text{H}$  NMR (500 MHz,  $\text{CDCl}_3$ )  $\delta$  ppm: 7.47 (s, 1H), 4.33 (t, 2H), 2.18 (s, 1H), 1.89-1.92 (m, 2H), 1.66 (s, 6H), 1.26-1.40 (m, 6H), 0.89 (t, 3H)

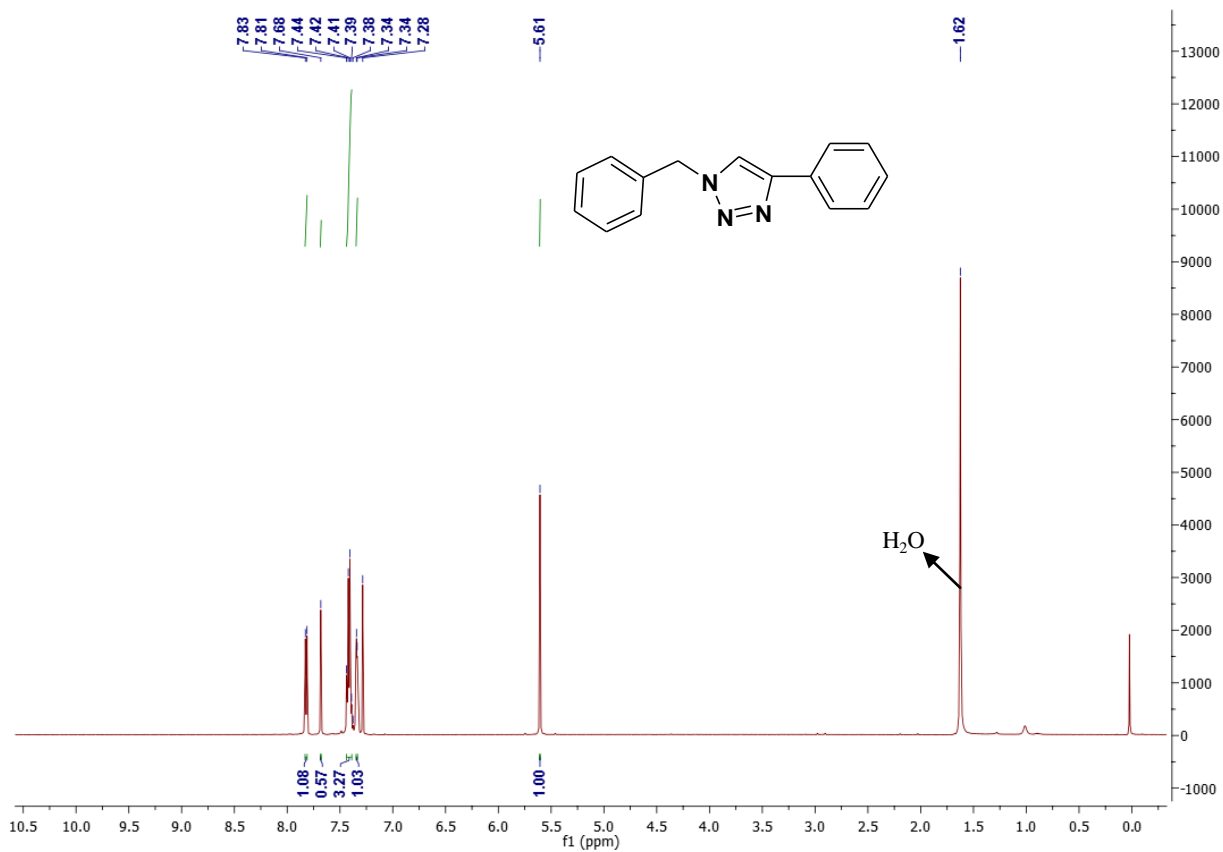

**Fig. S21**  $^1\text{H}$  NMR spectrum of **1-benzyl-4-phenyl-1H-1,2,3-triazole** ( $\text{CDCl}_3$ , 500 MHz, ppm)

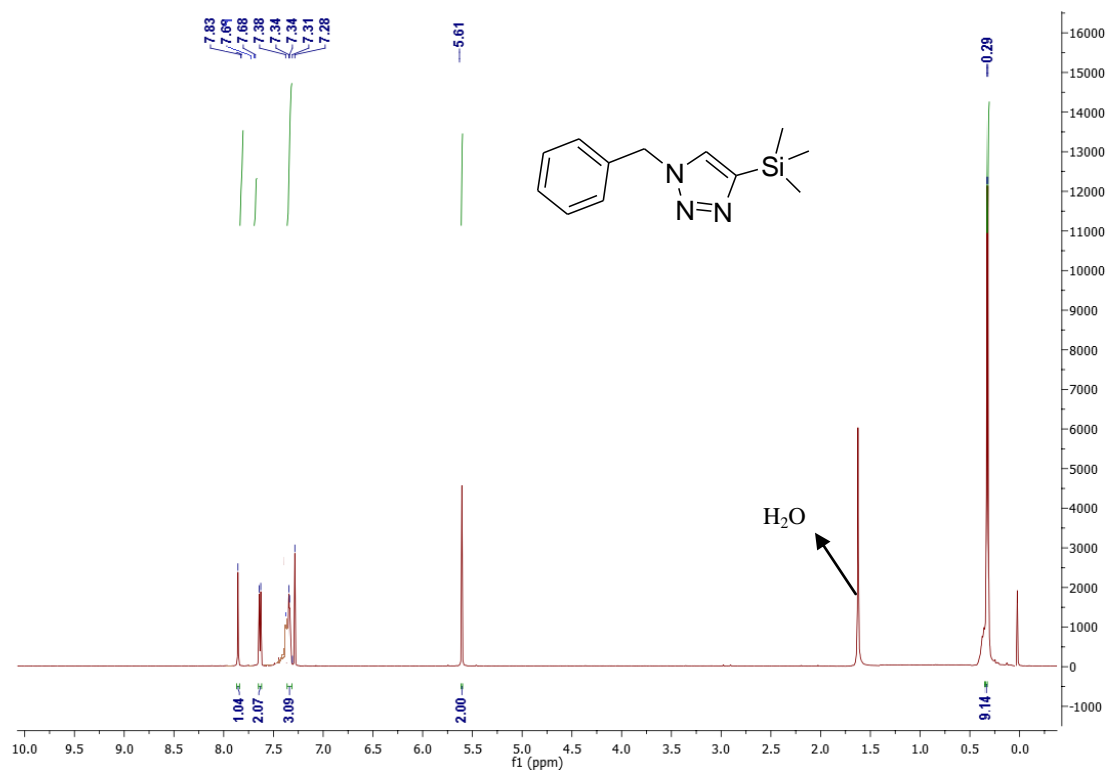

**Fig. S22**  $^1\text{H}$  NMR spectrum of **1-benzyl-4-(trimethylsilyl)-1H-1,2,3-triazole** ( $\text{CDCl}_3$ , 500 MHz, ppm)

$^1\text{H}$  NMR (500 MHz,  $\text{CDCl}_3$ )  $\delta$  ppm: 7.83 (s, 1H), 7.69 (d, 2H), 7.28-7.38 (m, 3H), 5.61 (s, 2H), 0.29 (s, 9H).

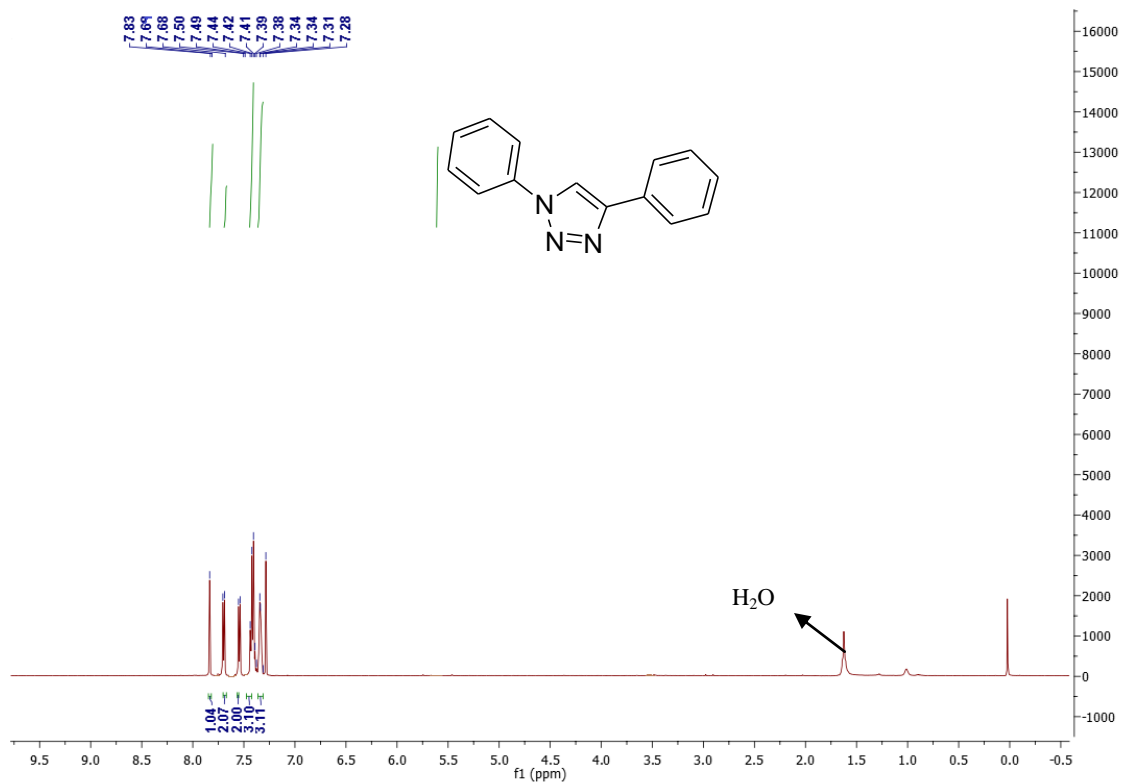

**Fig. S23** <sup>1</sup>H NMR spectrum of **1,4-diphenyl-1H-1,2,3-triazole** (CDCl<sub>3</sub>, 500 MHz, ppm)

<sup>1</sup>H NMR (500 MHz, CDCl<sub>3</sub>) δ ppm: 7.83 (s, 1H), 7.69 (d, 2H), 7.50 (d, 2H), 7.38-7.49 (m, 3H), 7.28-7.38 (m, 3H).

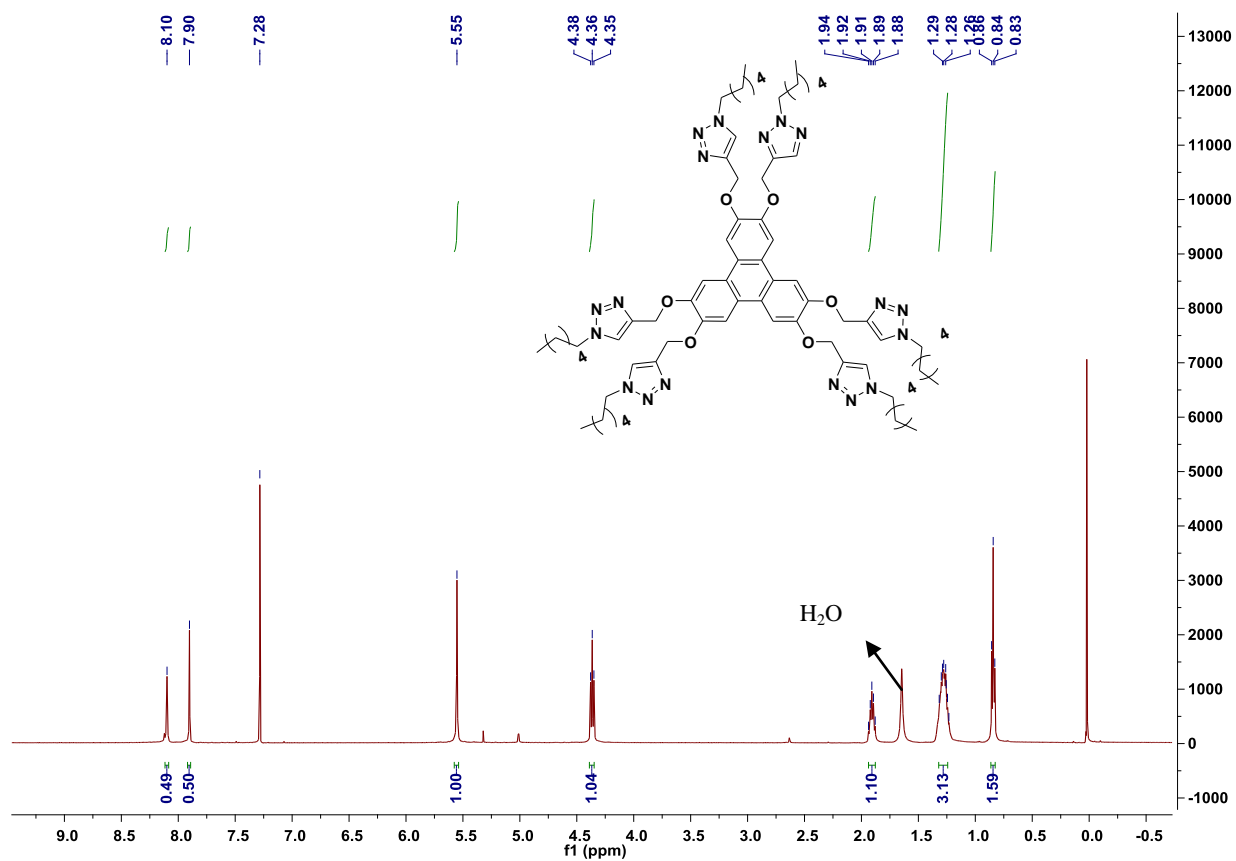

**Fig. S24**  $^1\text{H}$  NMR spectrum of derivative **7** ( $\text{CDCl}_3$ , 500 MHz, ppm)

$^1\text{H}$  NMR (500 MHz,  $\text{CDCl}_3$ )  $\delta$  ppm: 8.10 (s, 6H), 7.90 (s, 6H), 5.55 (s, 12H), 4.36 (t, 12H), 1.88-1.94 (m, 12H), 1.26-1.29 (m, 36H), 0.84 (t, 18H).

**Table S2:** Comparison of present method over other reported procedure in literature for the preparation of copper nanoparticles.

| Entry | Method of formation of copper nanoparticles           | Size of copper nanoparticles | Reaction time to prepare copper nanoparticles | Reducing agent or surfactants                      | Reaction temp. (°C) | Nanoparticles                 | Journals                                  |
|-------|-------------------------------------------------------|------------------------------|-----------------------------------------------|----------------------------------------------------|---------------------|-------------------------------|-------------------------------------------|
| 1.    | Wet chemical method                                   | 13 nm (average)              | 15 min                                        | no                                                 | Room temp.          | Copper Nanoparticles (Cu NPs) | Present manuscript                        |
| 2.    | Chemical method                                       | 8-10 nm                      | 3 hrs                                         | Hydrazine hydrate                                  | 40 °c               | Cu NPs                        | ACS Appl. Mater. Interfaces 2013, 5, 3839 |
| 3.    | Biosynthesis                                          | 15-20 nm                     | 24 hrs                                        | -----                                              | 35 °C               | Cu NPs                        | Nanoscale, 2013, 5, 2300                  |
| 4.    | chemisorption–hydrolysis method                       | 4.7 nm                       | Over night                                    | NH <sub>4</sub> OH                                 | 350 °C              | Cu NPs                        | ACS Catal. 2014, 4, 2818                  |
| 5.    | Chemical method                                       | 8-27 nm                      | 10 hrs                                        | NaOH                                               | 130 °C              | CuO                           | RSC Adv., 2012, 2, 1387                   |
| 6.    | Chemical method                                       | 2 nm                         | 8 hrs                                         | .....                                              | 140 °C              | Cu NPs                        | <i>Chem. Commun.</i> , 2012, 48, 3784     |
| 7.    | Chemical method                                       | -----                        | 10-15 min                                     | NaOH                                               | 60 °C               | Cu <sub>2</sub> O             | CrystEngComm, 2012, 14, 8454              |
| 8.    | Thermal decomposition                                 | 60 nm                        | 4 hrs                                         | -----                                              | 350 °C              | CuO                           | CrystEngComm, 2013, 15, 4077              |
| 9.    | Synthesis of copper nanoparticles using ionic liquids | 10 nm                        | 5 hrs                                         | Utilizing ionic liquids                            | -----               | Cu NPs                        | Ind. Eng. Chem. Res. 2013, 52, 794        |
| 10.   | Thermal decomposition of polymer                      | 50-70 nm                     | -----                                         | .....                                              | 450°C               | CuO                           | <i>New J. Chem.</i> , 2014, 38, 4267      |
| 11.   | Thermal reduction                                     | 28 nm                        | 1 hr                                          | triphenylphosphine                                 | 140°C               | Cu NPs                        | doi.org/10.1016/j.bioorg.2014.07.004      |
| 12.   | Chemical reduction                                    | 98 nm                        | 3 hrs                                         | NaH <sub>2</sub> PO <sub>2</sub> ·H <sub>2</sub> O | 140°C               | Cu NPs                        | Eur. J. Inorg. Chem. 2013, 4940           |
| 13.   | Polymer based micellar method                         | 36.6 nm                      | 30 min                                        | NaBH <sub>4</sub>                                  | -----               | Cu NPs                        | RSC Adv., 2014, 4, 14193                  |



**Table S3:** Comparison of catalytic efficiency of generated CuNPs for CuAAC (Cu catalyzed azide-alkyne ‘click’ reaction) in present manuscript with literature Reports.

| Entry | reference                                            | Catalyst                                                           | Conc. of catalyst | solvent                         | Time   | Temp.  |
|-------|------------------------------------------------------|--------------------------------------------------------------------|-------------------|---------------------------------|--------|--------|
| 1.    | Present manuscript                                   | Copper nanoparticles                                               | 1 mole%           | neat                            | 0.41 H | RT     |
| 2.    | <i>J. Am. Chem. Soc.</i> 2012, <b>134</b> , 9285.    | poly(imidazole-acrylamide)/CuSO <sub>4</sub> /NaAsc                | 0.25 mol%         | t-BuOH/<br>H <sub>2</sub> O 1/3 | 1.5 h  | 50 °C  |
| 3.    | <i>Green Chem.</i> , 2012, <b>14</b> , 1298.         | Cu-nanoparticulates in Guar-gum                                    | 10 W%             | EtOH                            | 5 h    | RT     |
| 4.    | <i>J. Org. Lett.</i> 2008, <b>10</b> , 497.          | Cu/AlO(OH)                                                         | 3 mol%            | n-hexane                        | 6 H    | 25 °C  |
| 5.    | <i>Green Chem.</i> 2011, <b>13</b> , 3440.           | ammonium NHC-CuI                                                   | 5 mol%            | H <sub>2</sub> O                | 3 H    | 20 °C  |
| 6.    | <i>J. Tetrahedron Letters</i> 2014, <b>55</b> , 2312 | Nano-copper                                                        | 5 mol%            | EtOH                            | 8 H    | RT     |
| 7.    | <i>Green Chem.</i> 2012, <b>14</b> , 625–632.        | nano-FGT-Cu                                                        | 2.4 mol%          | HO                              | 0.16 H | Mw 120 |
| 8.    | <i>Chem. Commun.</i> , 2008, 741                     | [Cu(C18 <sub>6</sub> tren)]Br                                      | 0.005 mol%        | toulene                         | 24 H   | 60 °C  |
| 9.    | <i>Appl. Catal., A</i> 2013, <b>453</b> , 151–158.   | CuSO <sub>4</sub> /N <sub>2</sub> H <sub>4</sub> -H <sub>2</sub> O | 0.0025 mol%       | H <sub>2</sub> O                | 4 H    | 20 °C  |
| 10.   | <i>Chem. Commun.</i> , 2013, <b>49</b> , 11358.      | Cu(I)-NHC                                                          | 1 mol%            | H <sub>2</sub> O                | 18 H   | RT     |
| 11.   | <i>Green Chem.</i> , 2012, <b>14</b> , 622.          | Cu@FeNPs                                                           | 5 mol%            | H <sub>2</sub> O                | 12 H   | RT     |
| 12.   | <i>Org. Biomol. Chem.</i> , 2011, <b>9</b> , 6385    | CuNPs on activated carbon                                          | 5 mol%            | H <sub>2</sub> O                | 7 H    | 70 °C  |
